# Supplementary material for: Folic Acid-Grafted Chitosan-Alginate Nanocapsules as Effective Targeted Nanocarriers for Delivery of Turmeric Oil for Breast Cancer Therapy
Source: MDPI journal article supplement (doi:10.3390/pharmaceutics15010110), 2022-12-28
Supplement: s1 [file s1]

# Folic acid-grafted chitosan-alginate nanocapsules as effective targeted nanocarriers for delivery of turmeric oil for breast cancer therapy

Htet Htet Moe San, Khent Primo Alcantara, Bryan Paul I. Bulatao, Feuangthit Niyamissara Sorasitthiyanukarn, Nonthaneth Nalinratana, Apichart Suksamrarn, Opa Vajragupta, Pranee Rojsitthisak, Pornchai Rojsitthisak

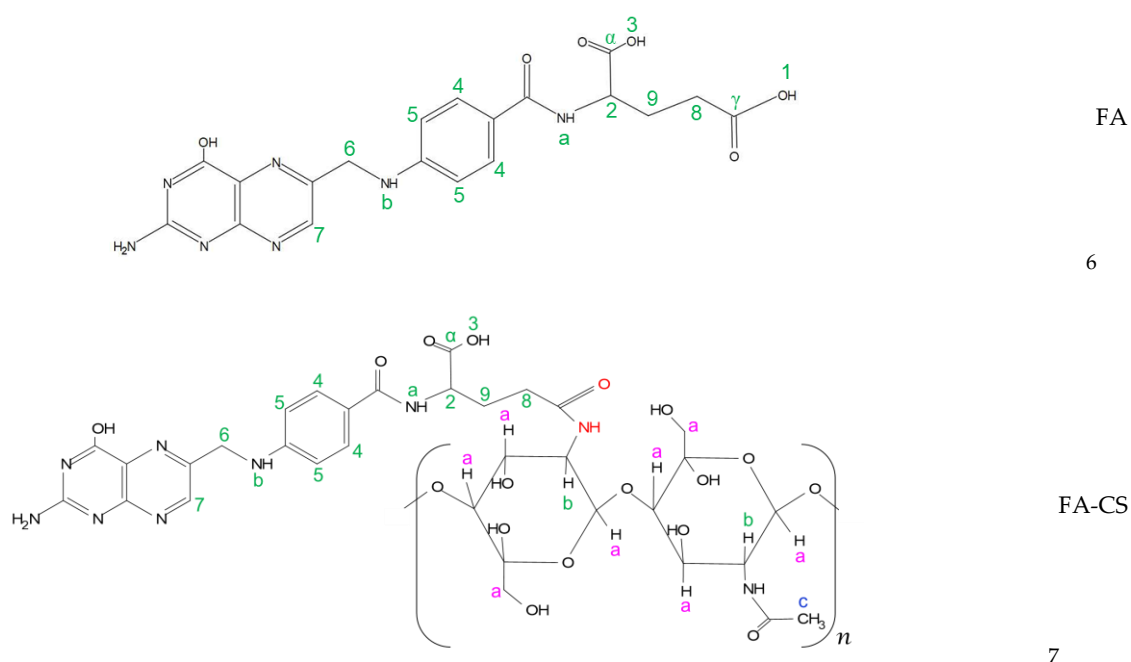

**Table S1.** Assignment of  $^1\text{H}$ -NMR spectral data of FA and FA-CS conjugate in  $\text{DMSO}-d_6$

| Position              | $^1\text{H}$ NMR Shift (ppm) |       |
|-----------------------|------------------------------|-------|
|                       | FA                           | FA-CS |
| NH (a)                | 8.13                         | -     |
| NH (b), $\text{NH}_2$ | 6.93                         | 6.90  |
| 1 -COOH               | 11.40                        | -     |
| 2                     | 4.30                         | 4.50  |
| 3 -COOH               | 12.30                        | 10.60 |
| 4                     | 7.66                         | 7.63  |
| 5                     | 6.60                         | 6.66  |
| 6                     | 4.50                         | 4.46  |
| 7                     | 8.60                         | 8.65  |
| 8                     | 2.30                         | 2.30  |
| 9                     | 2.14                         | 2.14  |

**Table S2.** Summary of the regression analyses of the responses.

| Response       | Suggested model | <i>p</i> -value, overall model | <i>p</i> -value, lack-of-fit | R <sup>2</sup> | Adjusted R <sup>2</sup> | Predicted R <sup>2</sup> | Adequate precision |
|----------------|-----------------|--------------------------------|------------------------------|----------------|-------------------------|--------------------------|--------------------|
| Y <sub>1</sub> | Quadratic       | < 0.0001                       | 0.5347                       | 0.9894         | 0.9787                  | 0.9220                   | 34.6723            |
| Y <sub>2</sub> | 2FI             | < 0.0001                       | 0.2620                       | 0.9885         | 0.9820                  | 0.9635                   | 44.0165            |
| Y <sub>3</sub> | Quadratic       | < 0.0001                       | 0.1039                       | 0.9930         | 0.9859                  | 0.9641                   | 38.5856            |

9  
10  
11  
12  
13  
14  
15  
16  
17  
18  
19  
20  
21  
22  
23  
24  
25  
26  
27  
28  
29  
30  
31  
32  
33  
34  
35

**Table S3.** Release kinetics of TO from TO-FA-CS-Alg-NCs

| Model                                                              | Media  | Parameter                         | R <sup>2</sup> adjusted | AIC     | MSC     |
|--------------------------------------------------------------------|--------|-----------------------------------|-------------------------|---------|---------|
| Zero order<br>( $F = k_0 \cdot t$ )                                | pH 5.5 | $k_0 = 2.976$                     | -0.7961                 | 90.1318 | -0.9216 |
|                                                                    | pH 7.4 | $k_0 = 3.633$                     | -0.3075                 | 93.3060 | -0.4488 |
| First order<br>( $F = 100 \cdot e^{-k_1 t}$ )                      | pH 5.5 | $k_1 = 0.053$                     | 0.0774                  | 82.8555 | -0.2601 |
|                                                                    | pH 7.4 | $k_1 = 0.075$                     | 0.5321                  | 81.9675 | 0.5820  |
| Higuchi<br>( $F = k_H \cdot t^{0.5}$ )                             | pH 5.5 | $k_H = 12.116$                    | 0.6697                  | 71.6241 | 0.7609  |
|                                                                    | pH 7.4 | $k_H = 14.603$                    | 0.7513                  | 75.0397 | 1.2118  |
| Korsmeyer-Peppas<br>( $F = k_{KP} \cdot t^n$ )                     | pH 5.5 | $k_{KP} = 17.166,$<br>$n = 0.345$ | 0.7879                  | 67.3280 | 1.1515  |
|                                                                    | pH 7.4 | $k_{KP} = 18.819,$<br>$n = 0.387$ | 0.7863                  | 74.2195 | 1.2863  |
| Hixson-Crowell<br>( $F = 100 \cdot [1 - (1 - k_{HC} \cdot t)^3]$ ) | pH 5.5 | $k_{HC} = 0.015$                  | -0.1687                 | 85.4417 | -0.4952 |
|                                                                    | pH 7.4 | $k_{HC} = 0.021$                  | 0.34170                 | 85.7354 | 0.2394  |

<sup>a</sup>Best-fit release kinetics model for TO-FA-CS-Alg-NCs. F is the fraction (%) of drug released at time t;  $k_0$  is the zero-order release constant;  $k_1$  is the first-order release constant;  $k_H$  is the Higuchi release constant;  $k_{KP}$  is the release constant incorporating structural and geometric characteristics of the drug-dosage form; n is the diffusional exponent indicating the drug-release mechanism;  $k_{HC}$  is the Hixson-Crowell release constant.

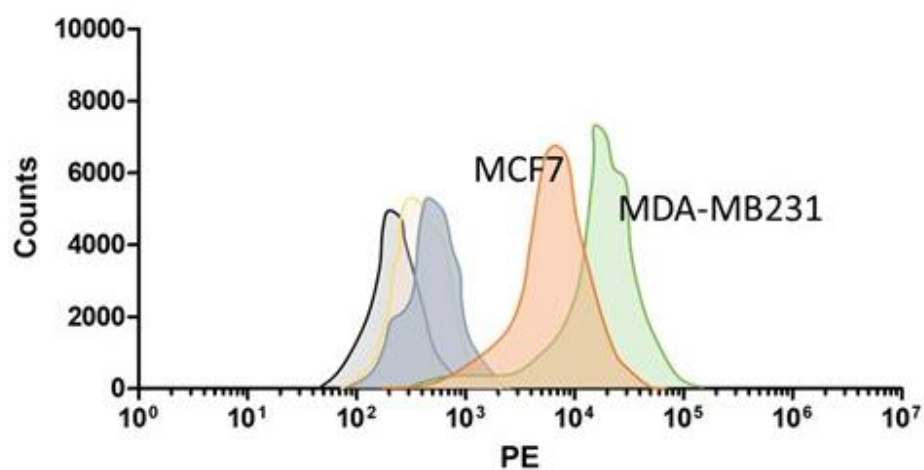

**Figure. S1** Folate expression levels in MDA-MB-231 and MCF-7 cell lines

60  
61
